# Supplementary material
Source: PubMed Central journal article supplement (PMC2657723)
Supplement: NIHMS62913-supplement-1File011.pdf [file NIHMS62913-supplement-1File011.pdf]

# Structural Impact of Three Parkinsonism-Associated Missense Mutations on Human DJ-1

Mahadevan Lakshminarasimhan<sup>+†</sup>, Marien T. Maldonado<sup>+†</sup>, Wenbo Zhou<sup>#</sup>, Anthony L. Fink<sup>#</sup>, and Mark A. Wilson<sup>+\*</sup>

<sup>+</sup>*Department of Biochemistry and the Redox Biology Center, The University of Nebraska-Lincoln, Lincoln, NE, 68588-0664 and* <sup>#</sup>*Department of Chemistry and Biochemistry, The University of California Santa Cruz, CA, 95064*

<sup>†</sup> Both authors contributed equally to this work

<sup>\*</sup> To whom correspondence should be addressed

## SUPPORTING INFORMATION

| Protein   | Dimeric molecular weight<br>(calculated; Da) | Dimeric molecular weight<br>(fit; Da) |
|-----------|----------------------------------------------|---------------------------------------|
| Wild-type | 40345                                        | 37793                                 |
| A104T     | 40405                                        | 35264                                 |
| E163K     | 40343                                        | 40876                                 |
| M26I      | 40309                                        | 36407                                 |

**Table S1.** Comparison of theoretical and fit molecular weights for dimeric DJ-1

determined from the representative sedimentation equilibrium ultracentrifugation experiment illustrated in Figure 3. The theoretical molecular weights are those calculated for the tag-cleaved protein (see Experimental Procedures), which includes a GSH- “scar” sequence at the N-terminus of each protein resulting from thrombin cleavage of the N-terminal hexa-histidine tag.

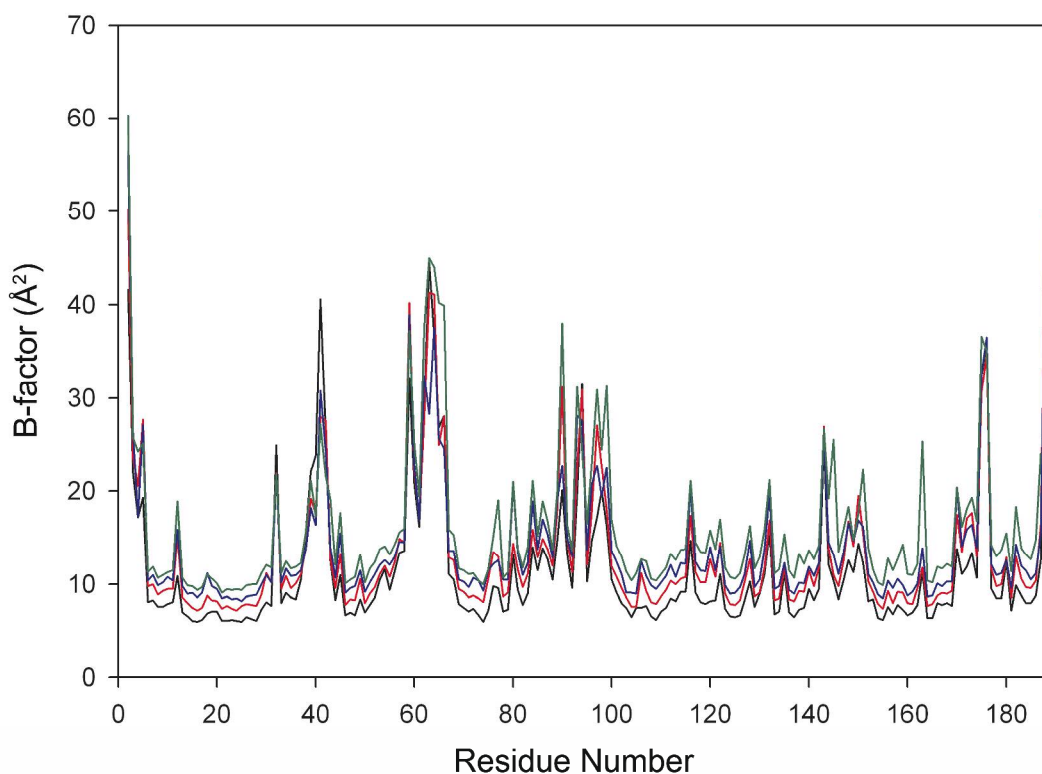

**Figure S2.** Comparison of refined  $B_{eq}$  factors for DJ-1. The residue averaged  $B$ -factors for wild-type (PDB 1SOA; black), M26I (red), A104T (blue) and E163K (green) DJ-1 are shown as a function of residue number. Each structure was refined in SHELX-97 with anisotropic displacement parameters; therefore the  $B_{eq}$  is the isotropic equivalent  $B$ -factor as reported in the PDB. Overall, the four proteins display very similar distributions of  $B$ -factors, with some noticeable differences for E163K from residues 140-180. Interestingly, the average  $B$ -factor for each protein is inversely correlated with its  $T_m$  (see Table 1 and Figure 2), as demonstrated above by the  $B$ -factor baseline offsets that increase as measured stability of the protein decreases (rank order of stability: wt>M26I>A104T>E163K). We note that many experimental factors can influence the overall  $B$ -factor, however, and this correlation may be coincidental.

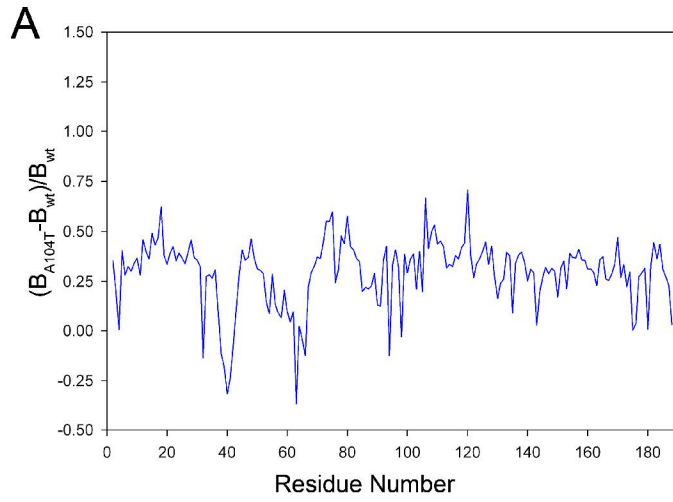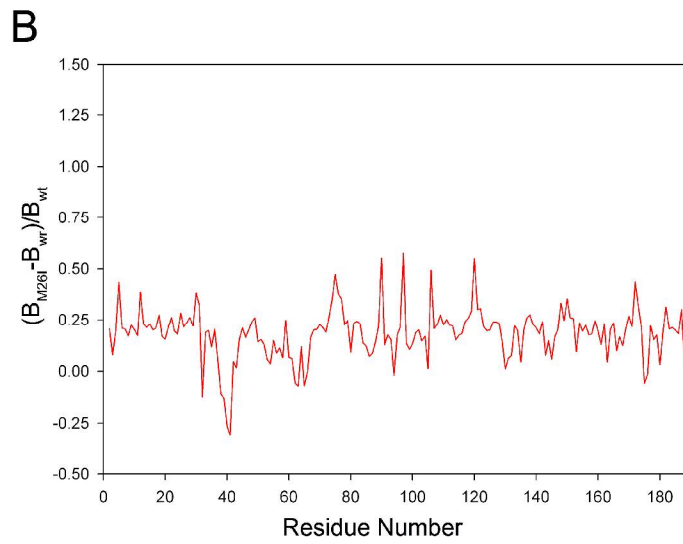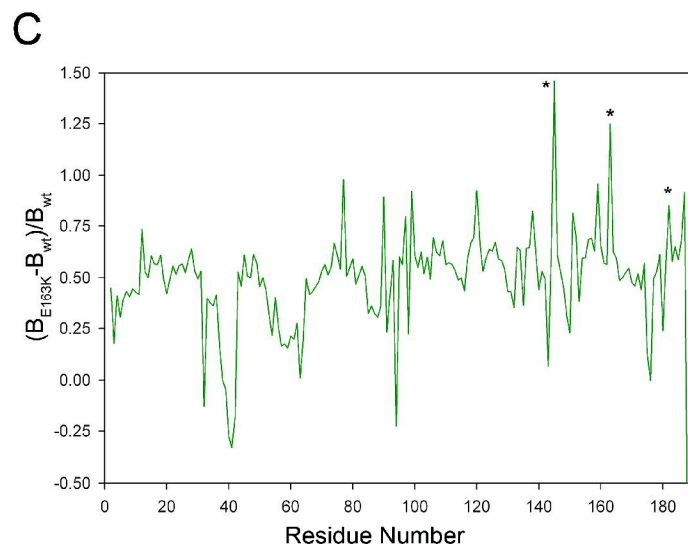

**Figure S3.** Normalized difference B-factors for each of the three PD-associated DJ-1 mutations. In each panel, the difference between the residue averaged B-factor of the mutant protein and wtDJ-1 (PDB 1SOA) is divided by the residue averaged B-factor of the wild-type protein ( $\frac{\{B_{mut} - B_{wt}\}}{B_{wt}}$ ) to provide a residue averaged difference B-factor that is weighted by the B-factors of the wild-type protein. This is an approximate form of error scaling, since larger B-factors in the wild-type protein will be associated with larger errors, and the corresponding normalized difference B-factor will be smaller. Panel A shows A104T DJ-1 (blue), Panel B shows M26I DJ-1 (red) and Panel C shows E163K DJ-1 (green). All three mutants show lower mobility than wtDJ-1 in two regions centered around residues 40 and 60. The most significant elevations in normalized difference B-factors are seen in E163K (Panel C), where residues 145, 163 and 186 (indicated with asterisks) are significantly more mobile in the mutant protein. These residues are involved in a dimer-spanning network of hydrogen bonds that is disrupted by the E163K substitution (Figure 7).
